# Supplementary material
Source: PubMed Central journal article supplement (PMC6147217)
Supplement: NIHMS78799-supplement-Supplementary_figure.pdf [file NIHMS78799-supplement-Supplementary_figure.pdf]

**Figure S1**

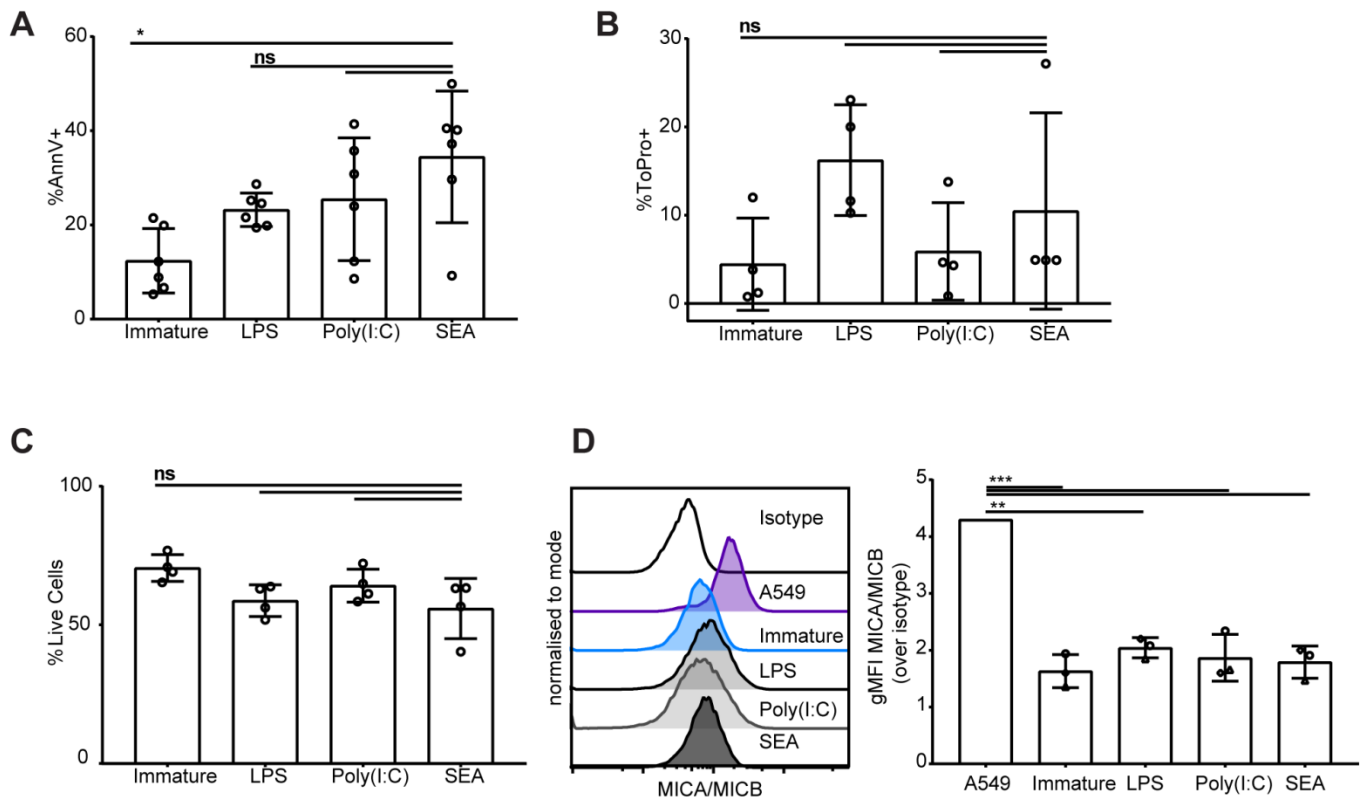

**Figure S1. DCs treated with SEA have similar viability to DCs treated with LPS or Poly(I:C).** (A) The proportion of immature DCs or DCs treated for 24 h with LPS, Poly(I:C) or SEA stained positive for annexin V after being washed and cultured alone for 5 h. (B) The proportion of immature DCs or DCs treated for 24 h with LPS, Poly(I:C) or SEA stained with cell death marker ToPro 3 Iodide after being washed and cultured alone for 5 h. (C) The proportion of live immature DCs or DCs treated for 24 h with LPS, Poly(I:C) or SEA as measured by staining with fixable viability dye. (D) Expression of MICA/MICB on the surface of immature DCs or DCs treated for 24 h with LPS, Poly(I:C) or SEA. Histograms show representative overlays of live, CD11c+ CD14- singlet DCs from representative donors (left), from top to bottom showing isotype matched control, then mAb staining of A549 tumour cells, immature DCs or DCs treated with LPS, Poly(I:C) or SEA respectively. Graphs show gMFI isotype matched control of DCs from 3 independent donors. In all plots shapes represent data points from individual donors and bars show mean ( $\pm$  standard deviation) of 3-6 independent donors.  $p < 0.05$ , \*\*  $p < 0.01$ , \*\*\*  $p < 0.001$ ; (A-C) analysed by Kruskal wallis test with Dunn's multiple comparisons. (D) Analysed by repeated measures one way ANOVA with Tukey's multiple comparisons.
